# Supplementary material for: Progranulin loss results in sex-dependent dysregulation of the peripheral and central immune system
Source: PubMed Central journal article supplement (PMC9814971; doi:10.3389/fimmu.2022.1056417), 2022-12-22
Supplement: Table_1.pdf [file Table_1.pdf]

| Antibody                         | Manufacturer | Catalog Number | Concentration /Dilution |
|----------------------------------|--------------|----------------|-------------------------|
| PGRN                             | R&D Systems  | AF2420         | 1:50                    |
| Rt anti CD16/CD32                | eBioscience  | 14-0161-85     | 1:100                   |
| Rt anti-Ly-6G- <b>PacBlue</b>    | BioLegend    | 127611         | 1:100                   |
| Rt anti-CD11b- <b>PE-Cy7</b>     | BioLegend    | 101215         | 1:200                   |
| Rt anti-CD8b- <b>PE</b>          | eBioscience  | 12-0083-81     | 1:100                   |
| Rt anti-MHC-II- <b>APC-Cy7</b>   | BioLegend    | 107627         | 1:100                   |
| Rt anti-CD45- <b>PerCP-Cy5.5</b> | eBioscience  | 45-0451-80     | 1:100                   |
| Ah anti-CD3- <b>PE-610</b>       | eBioscience  | 61-0031        | 1:100                   |
| Ah anti-CD11c- <b>AF700</b>      | BioLegend    | 117320         | 1:100                   |
| Rt anti-CD44- <b>APC</b>         | BioLegend    | 103012         | 1:100                   |
| Rt anti-GPNMB- <b>eFluor660</b>  | eBioscience  | 50-5708-82     | 1:50                    |
| Rt anti-Ly-6C- <b>AF488</b>      | eBioscience  | 53-5932-82     | 1:200                   |
| Rt anti-CD19- <b>BV650</b>       | BioLegend    | 115541         | 1:100                   |
| Rt anti-CD4- <b>BV711</b>        | BioLegend    | 100447         | 1:200                   |

Supplemental Table 1. Antibodies used in this study

Conjugates are indicated in bold. Rb – rabbit, Rt – rat, Ah – Armenian hamster, AF – Alexa Fluor
